# Supplementary material for: Zoo: Selecting Transcriptomic and Methylomic Biomarkers by Ensembling Animal-Inspired Swarm Intelligence Feature Selection Algorithms
Source: MDPI journal article supplement (doi:10.3390/genes12111814), 2021-11-18
Supplement: s1 [file s1]

# Zoo, Selecting Transcriptomic and Methyloomic Biomarkers by Ensembling Animal-Inspired Swarm Intelligence Feature Selection Algorithms

Yuanyuan Han, Lan Huang \* and Fengfeng Zhou\*

College of Computer Science and Technology, and Key Laboratory of Symbolic Computation and Knowledge Engineering of Ministry of Education, Jilin University, Changchun, Jilin, China, 130012.

\* Correspondence: FengfengZhou@gmail.com or ffzhou@jlu.edu.cn (F.Z.).

## Table S1

**Datasets evaluated in this study.** The column “Dataset” gave the abbreviation of each dataset. Two types of datasets were used in this study, i.e., Transcriptome and Methyloome, as described in the column “Type”. The column “Phenotype” gave the full names of the investigated phenotypes. The detailed information of the two classes of the samples were given in the column “Classes”, with the bracketed sample numbers for each class. The numbers of total features and samples were listed in the column “FNum” and “SNum”.

| ID | Dataset | Type          | Phenotype                                            | Classes                                                 | FNum   | SNum |
|----|---------|---------------|------------------------------------------------------|---------------------------------------------------------|--------|------|
| 1  | DLBCL   | Transcriptome | diffuse large B-cell lymphoma                        | DLBCL patients (58) and follicular lymphoma (19)        | 7,129  | 77   |
| 2  | Pros    | Transcriptome | prostate cancer                                      | prostate (52) and non-prostate (50)                     | 12,625 | 102  |
| 3  | Colon   | Transcriptome | colon cancer                                         | tumour (40) and normal (22)                             | 2,000  | 62   |
| 4  | Leuk    | Transcriptome | acute lymphocytic leukemia vs acute myeloid leukemia | ALL (47) and AML (25)                                   | 7,129  | 72   |
| 5  | Mye     | Transcriptome | myeloma                                              | presence (137) and absence (36) of focallesions of bone | 12,625 | 173  |

|    |          |               |                               |                                                                   |        |     |
|----|----------|---------------|-------------------------------|-------------------------------------------------------------------|--------|-----|
| 6  | ALL1     | Transcriptome | acute lymphocytic leukemia    | B-cell (95) and T-cell (33)                                       | 12,625 | 128 |
| 7  | ALL2     | Transcriptome | acute lymphocytic leukemia    | Patients that did (65) and did not (35) relapse                   | 12,625 | 100 |
| 8  | ALL3     | Transcriptome | acute lymphocytic leukemia    | with (24) and without (101) multidrug resistance                  | 12,625 | 125 |
| 9  | ALL4     | Transcriptome | acute lymphocytic leukemia    | with (26) and without (67) the t(9;22) chromosome translocation   | 12,625 | 93  |
| 10 | CNS      | Transcriptome | central nervous system tumor  | medulloblastoma survivors (39) and treatment failures (21)        | 7,129  | 60  |
| 11 | Lym      | Transcriptome | diffuse large B-cell lymphoma | germinalcentre (22) and activated B-like DLBCL (23)               | 4,026  | 45  |
| 12 | Adeno    | Transcriptome | colon adenocarcinoma          | colon adenocarcinoma (18) and normal (18)                         | 7,457  | 36  |
| 13 | Gas      | Transcriptome | gastric cancer                | tumors (29) and non-malignants (36)                               | 22,645 | 65  |
| 14 | Gas1     | Transcriptome | non-cardia gastric cancer     | non-cardia (72) of gastric and normal (72)                        | 22,283 | 144 |
| 15 | Gas2     | Transcriptome | cardia gastric cancer         | cardia (62) of gastric and normal (62)                            | 22,283 | 124 |
| 16 | T1D      | Transcriptome | type 1 diabetes               | T1D (57) and healthy control (44)                                 | 54,675 | 101 |
| 17 | Stroke   | Transcriptome | ischemic stroke               | ischemic stroke (20) and control (20)                             | 54,675 | 40  |
| 18 | GSE33532 | Transcriptome | lung cancer                   | primary lung cancers (80) and distant unaffected lung tissue (20) | 54,675 | 100 |
| 19 | GSE19804 | Transcriptome | lung cancer                   | 60 paired lung cancers and adjacent normal lung tissue            | 12,625 | 120 |

|    |            |               |                                                           |                                                                                                    |         |     |
|----|------------|---------------|-----------------------------------------------------------|----------------------------------------------------------------------------------------------------|---------|-----|
| 20 | GSE30219   | Transcriptome | lung cancer                                               | early-stage (N0) lung cancers (198) and lung cancers on the other stages (N1, N2, or N3)(93)       | 12,625  | 291 |
| 21 | GSE35570-2 | Transcriptome | PTC samples with the radiation treatments                 | PTC samples with the radiation treatments(33) and PTC samples without the radiation treatments(32) | 54,675  | 65  |
| 22 | GSE25507   | Transcriptome | pediatric autism                                          | peripheral blood lymphocytes (PBL) of pediatric autism patients (82) and healthy children(64)      | 54,675  | 146 |
| 23 | GSE99039   | Transcriptome | Idiopathic Parkinson's disease                            | patients (205)and controls(233)                                                                    | 54,675  | 438 |
| 24 | GSE21510   | Transcriptome | colorectal cancer                                         | metastatic recurrent colorectal cancers (54) and primary colorectal cancers(94)                    | 54,675  | 148 |
| 25 | GSE27562   | Transcriptome | breast cancer                                             | invasive breast cancer patients (51) and patients with benign diagnosis (37)                       | 12,625  | 88  |
| 26 | GSE4824    | Transcriptome | lung cancer                                               | male(52) and female(25) lung cancer cell lines                                                     | 22,283  | 77  |
| 27 | GSE35570-1 | Transcriptome | periodic thyroid cancer (PTC) without radiation treatment | periodic thyroid cancer (PTC) without radiation treatment(32) and normal samples(51)               | 54,675  | 83  |
| 28 | GSE53045   | Methylome     | smoking                                                   | peripheral blood mononuclear cells (PBMC) for smokers (50)and non-smokers(61)                      | 485,577 | 111 |
| 29 | GSE66695   | Methylome     | breast cancer                                             | breast cancer patients (80) and normal controls(40)                                                | 485,577 | 120 |
| 30 | GSE103186  | Methylome     | gastric light or mild intestinal metaplasia               | gastric light or mild intestinal metaplasia(130) and gastric normal controls(61)                   | 467,971 | 191 |
| 31 | GSE74845   | Methylome     | breast cancer                                             | Fimbria(110) and proximal(106) tubal DNA samples                                                   | 470,425 | 216 |
| 32 | GSE80970   | Methylome     | Alzheimer's Disease                                       | Alzheimer's Disease (148)samples and control(138) brain tissues                                    | 485,577 | 286 |

## Table S2

**Details of the nine feature selection algorithms.** The column “Algorithm” gives the names of the feature selection algorithms. The column “Function” gives the library function of this algorithm in the Python package sklearn version 0.19.2 used in this study. The last column “Parameter” gives how this function is called for this feature selection algorithm.

| Algorithm | Function                     | Parameter                     |
|-----------|------------------------------|-------------------------------|
| DT_gini   | DecisionTreeClassifier()     | default parameters            |
| RF        | RandomForestClassifier()     | default parameters            |
| AdaBoost  | AdaBoostClassifier()         | default parameters            |
| GB        | GradientBoostingClassifier() | default parameters            |
| LR_L1     | penalty; solver              | l1; liblinear                 |
| LSVC_L1   | penalty; loss; dual          | l1; squared_hinge; False      |
| RFE_SVC   | estimator; step              | LinearSVC(); 0.5              |
| RFE_RF    | estimator; step              | RandomForestClassifier(); 0.5 |
| SK_mic    | score_func                   | mutual_info_classif           |

## Table S3

**Default values for the parameters of the nine SI feature selection algorithms integrated in the Zoo algorithm.**

| Algorithm          | Parameter                                      | Value |
|--------------------|------------------------------------------------|-------|
| CS                 | Pa                                             | 0.3   |
| DF                 | Inertia weight lower limit                     | 0.5   |
| BA                 | Loudness A                                     | 0.2   |
| BA                 | Pulse frequency r                              | 0.2   |
| PSO                | Cognitive learning factor c1                   | 2     |
| PSO                | Social learning factor c2                      | 2     |
| PSO                | Inertia weight loss lower limit $\omega_{min}$ | 0.1   |
| CS                 | N                                              | 80    |
| DF                 | N                                              | 30    |
| BA                 | N                                              | 30    |
| PSO                | N                                              | 80    |
| GWO                | N                                              | 10    |
| WOA                | N                                              | 10    |
| FA                 | N                                              | 30    |
| MFO                | N                                              | 90    |
| MRFO               | N                                              | 10    |
| Nine SI algorithms | Max number of iterations (T)                   | 150   |

## Figure S1

**Optimizing the parameters of the remaining four SI feature selection algorithms.** (a) The parameters pulse emission rate (R), loudness (A) and population size (N) of the bat algorithm (BA) were evaluated by the data in the two heatmaps, assuming  $R=A$  for simplicity. (b) The lower bound of the inertia weight (MinW) and the population size (N) of the particle swarm optimization (PSO) algorithm were evaluated. (c) The probability of a cuckoo-laid egg being found by the host bird (ProbF) and the population size (N) of the cuckoo search (CS) algorithm were evaluated in the two heatmaps. And (d) the two heatmaps evaluated different value choices of the lower bound of the inertia weight (MinW) and the population size (N) of the dragonfly (DF) algorithm.

| <b>R=A</b> | 0.1    | 0.2    | 0.3    | 0.4    | 0.5    | 0.6    | 0.7    | 0.8    | 0.9    |
|------------|--------|--------|--------|--------|--------|--------|--------|--------|--------|
| ALL2       | 0.5588 | 0.5588 | 0.5588 | 0.5588 | 0.5588 | 0.5588 | 0.5588 | 0.5588 | 0.5588 |
| ALL3       | 0.7381 | 0.7619 | 0.7381 | 0.7619 | 0.7381 | 0.7381 | 0.7381 | 0.7381 | 0.7381 |
| ALL4       | 0.7097 | 0.7097 | 0.7097 | 0.7097 | 0.7097 | 0.7097 | 0.7097 | 0.7097 | 0.7097 |
| CNS        | 0.7000 | 0.7000 | 0.7000 | 0.6000 | 0.7000 | 0.7000 | 0.6000 | 0.7000 | 0.7000 |
| Colon      | 0.7500 | 0.7500 | 0.8000 | 0.7500 | 0.8000 | 0.7500 | 0.7500 | 0.8000 | 0.7500 |
| Mye        | 0.7931 | 0.8103 | 0.7931 | 0.7931 | 0.7931 | 0.7931 | 0.8103 | 0.8103 | 0.7931 |
| T1D        | 0.5294 | 0.5294 | 0.5294 | 0.5294 | 0.5294 | 0.5294 | 0.5000 | 0.5294 | 0.5294 |

| <b>N</b> | 10     | 20     | 30     | 40     | 50     | 60     | 70     | 80     | 90     | 100    |
|----------|--------|--------|--------|--------|--------|--------|--------|--------|--------|--------|
| ALL2     | 0.5588 | 0.5588 | 0.5588 | 0.5588 | 0.5588 | 0.5588 | 0.5588 | 0.5588 | 0.5588 | 0.5588 |
| ALL3     | 0.7619 | 0.7619 | 0.7381 | 0.7381 | 0.7381 | 0.7381 | 0.7381 | 0.7619 | 0.7381 | 0.7381 |
| ALL4     | 0.7097 | 0.7097 | 0.7097 | 0.7097 | 0.7097 | 0.7097 | 0.7097 | 0.7097 | 0.7097 | 0.7097 |
| CNS      | 0.6000 | 0.6000 | 0.7000 | 0.7000 | 0.7000 | 0.6000 | 0.7000 | 0.7000 | 0.6500 | 0.7000 |
| Colon    | 0.7500 | 0.8500 | 0.8500 | 0.7500 | 0.8000 | 0.7500 | 0.8000 | 0.7500 | 0.7500 | 0.7500 |
| Mye      | 0.7931 | 0.8103 | 0.8103 | 0.7931 | 0.7931 | 0.8103 | 0.7931 | 0.8103 | 0.8103 | 0.8103 |
| T1D      | 0.4706 | 0.5294 | 0.5294 | 0.5294 | 0.5294 | 0.5294 | 0.5294 | 0.5294 | 0.5294 | 0.5294 |

(a)

| <b>MinW</b> | 0.1    | 0.2    | 0.3    | 0.4    | 0.5    | 0.6    | 0.7    | 0.8    | 0.9    |
|-------------|--------|--------|--------|--------|--------|--------|--------|--------|--------|
| ALL2        | 0.5588 | 0.5588 | 0.5588 | 0.5588 | 0.5588 | 0.5588 | 0.5588 | 0.5588 | 0.5588 |
| ALL3        | 0.7619 | 0.7619 | 0.7619 | 0.7381 | 0.7619 | 0.7619 | 0.7381 | 0.7381 | 0.7381 |
| ALL4        | 0.7097 | 0.7097 | 0.7097 | 0.7097 | 0.7097 | 0.7097 | 0.7097 | 0.7097 | 0.7097 |
| CNS         | 0.6500 | 0.6500 | 0.6500 | 0.6500 | 0.7000 | 0.6500 | 0.7000 | 0.5500 | 0.6000 |
| Colon       | 0.8500 | 0.8500 | 0.8000 | 0.7500 | 0.7500 | 0.8000 | 0.8500 | 0.8000 | 0.8500 |
| Mye         | 0.8103 | 0.8103 | 0.7931 | 0.7931 | 0.7931 | 0.7931 | 0.7931 | 0.7931 | 0.7931 |
| T1D         | 0.5294 | 0.5294 | 0.5294 | 0.5294 | 0.5294 | 0.5294 | 0.5000 | 0.5294 | 0.5294 |

| <b>N</b> | 10     | 20     | 30     | 40     | 50     | 60     | 70     | 80     | 90     | 100    |
|----------|--------|--------|--------|--------|--------|--------|--------|--------|--------|--------|
| ALL2     | 0.5588 | 0.5588 | 0.5588 | 0.5588 | 0.5588 | 0.5588 | 0.5588 | 0.5588 | 0.5588 | 0.5588 |
| ALL3     | 0.7381 | 0.7381 | 0.7381 | 0.7619 | 0.7381 | 0.7381 | 0.7619 | 0.7381 | 0.7619 | 0.7381 |
| ALL4     | 0.7097 | 0.7097 | 0.7097 | 0.7097 | 0.7097 | 0.7097 | 0.7097 | 0.7097 | 0.7097 | 0.7097 |
| CNS      | 0.7000 | 0.6500 | 0.6000 | 0.6500 | 0.7000 | 0.5500 | 0.5500 | 0.6000 | 0.6500 | 0.6000 |
| Colon    | 0.8000 | 0.7500 | 0.7500 | 0.7500 | 0.7500 | 0.8000 | 0.8500 | 0.9500 | 0.7500 | 0.7500 |
| Mye      | 0.7931 | 0.7931 | 0.8103 | 0.7931 | 0.7931 | 0.7931 | 0.7931 | 0.7931 | 0.7931 | 0.7931 |
| T1D      | 0.5000 | 0.5294 | 0.5294 | 0.5294 | 0.5294 | 0.5294 | 0.5294 | 0.5294 | 0.5294 | 0.5294 |

(b)

| ProbF | 0.1    | 0.2    | 0.3    | 0.4    | 0.5    | 0.6    | 0.7    | 0.8    | 0.9    |
|-------|--------|--------|--------|--------|--------|--------|--------|--------|--------|
| ALL2  | 0.5588 | 0.5588 | 0.5588 | 0.5588 | 0.5588 | 0.5588 | 0.5882 | 0.5588 | 0.5588 |
| ALL3  | 0.7619 | 0.7619 | 0.7619 | 0.7381 | 0.7619 | 0.7381 | 0.7619 | 0.7619 | 0.7381 |
| ALL4  | 0.7097 | 0.7097 | 0.7097 | 0.7097 | 0.7097 | 0.7097 | 0.7097 | 0.7097 | 0.7097 |
| CNS   | 0.6000 | 0.6000 | 0.6500 | 0.6000 | 0.5000 | 0.5500 | 0.5500 | 0.6500 | 0.7000 |
| Colon | 0.9000 | 0.7500 | 0.8000 | 0.8500 | 0.8500 | 0.9000 | 0.8000 | 0.8500 | 0.8000 |
| Mye   | 0.7931 | 0.8103 | 0.7931 | 0.7931 | 0.7931 | 0.8103 | 0.7931 | 0.7931 | 0.7931 |
| T1D   | 0.4706 | 0.5000 | 0.5294 | 0.5294 | 0.5294 | 0.5000 | 0.5294 | 0.5294 | 0.5000 |

| N     | 10     | 20     | 30     | 40     | 50     | 60     | 70     | 80     | 90     | 100    |
|-------|--------|--------|--------|--------|--------|--------|--------|--------|--------|--------|
| ALL2  | 0.5588 | 0.5588 | 0.5588 | 0.5588 | 0.5294 | 0.5588 | 0.5588 | 0.5882 | 0.5588 | 0.5588 |
| ALL3  | 0.7381 | 0.7381 | 0.7619 | 0.7381 | 0.7619 | 0.7619 | 0.7619 | 0.7381 | 0.7619 | 0.7381 |
| ALL4  | 0.7097 | 0.7097 | 0.7097 | 0.7097 | 0.7097 | 0.7097 | 0.7097 | 0.7097 | 0.7097 | 0.7097 |
| CNS   | 0.6000 | 0.6000 | 0.6500 | 0.5500 | 0.5000 | 0.5500 | 0.5500 | 0.6000 | 0.6000 | 0.5500 |
| Colon | 0.8000 | 0.8000 | 0.7500 | 0.8000 | 0.8000 | 0.8000 | 0.8500 | 0.8500 | 0.7500 | 0.8000 |
| Mye   | 0.7931 | 0.7931 | 0.8103 | 0.7931 | 0.8103 | 0.8103 | 0.7931 | 0.7931 | 0.8103 | 0.7931 |
| T1D   | 0.5000 | 0.5294 | 0.5000 | 0.5294 | 0.5000 | 0.5294 | 0.5294 | 0.5294 | 0.5294 | 0.5294 |

(c)

| MinW  | 0.1    | 0.2    | 0.3    | 0.4    | 0.5    | 0.6    | 0.7    | 0.8    | 0.9    |
|-------|--------|--------|--------|--------|--------|--------|--------|--------|--------|
| ALL2  | 0.6176 | 0.5294 | 0.6176 | 0.5882 | 0.5588 | 0.5882 | 0.5588 | 0.5588 | 0.5588 |
| ALL3  | 0.7619 | 0.7381 | 0.7143 | 0.7619 | 0.7619 | 0.7857 | 0.7619 | 0.7619 | 0.7619 |
| ALL4  | 0.7097 | 0.7097 | 0.7419 | 0.7097 | 0.7419 | 0.7097 | 0.7419 | 0.7097 | 0.7097 |
| CNS   | 0.6500 | 0.6500 | 0.4000 | 0.6000 | 0.7000 | 0.6000 | 0.6000 | 0.6500 | 0.7000 |
| Colon | 0.7759 | 0.7759 | 0.7759 | 0.7759 | 0.7931 | 0.7931 | 0.7759 | 0.7931 | 0.8103 |
| Mye   | 0.5000 | 0.4412 | 0.5000 | 0.4412 | 0.5294 | 0.5000 | 0.4706 | 0.4706 | 0.5294 |
| T1D   | 0.5736 | 0.5492 | 0.5357 | 0.5538 | 0.5836 | 0.5681 | 0.5584 | 0.5634 | 0.5815 |

| N     | 10     | 20     | 30     | 40     | 50     | 60     | 70     | 80     | 90     | 100    |
|-------|--------|--------|--------|--------|--------|--------|--------|--------|--------|--------|
| ALL2  | 0.5588 | 0.5588 | 0.5588 | 0.5294 | 0.5588 | 0.5000 | 0.5588 | 0.5588 | 0.5882 | 0.5882 |
| ALL3  | 0.7619 | 0.7619 | 0.7619 | 0.7143 | 0.7381 | 0.7619 | 0.7381 | 0.7381 | 0.7381 | 0.7619 |
| ALL4  | 0.7419 | 0.6774 | 0.7419 | 0.6774 | 0.7097 | 0.7097 | 0.7419 | 0.7097 | 0.7419 | 0.7097 |
| CNS   | 0.5000 | 0.6000 | 0.6500 | 0.5500 | 0.5500 | 0.6000 | 0.6000 | 0.5500 | 0.6000 | 0.5000 |
| Colon | 0.8000 | 0.8500 | 0.8500 | 0.8500 | 0.8000 | 0.7500 | 0.9000 | 0.8000 | 0.7000 | 0.7500 |
| Mye   | 0.8103 | 0.7931 | 0.7931 | 0.7931 | 0.7759 | 0.7931 | 0.7931 | 0.7931 | 0.7931 | 0.7931 |
| T1D   | 0.5000 | 0.5294 | 0.5000 | 0.5000 | 0.5000 | 0.5000 | 0.4412 | 0.5000 | 0.5000 | 0.4706 |

(d)
